# Supplementary material for: Seasonal Variations in Fungal Communities on the Surfaces of Lan Na Sandstone Sculptures and Their Biodeterioration Capacities
Source: MDPI journal article supplement (doi:10.3390/jof9080833), 2023-08-08
Supplement: s1 [file s1]

**Table S1.** Growth of fungal isolates on PDA agar mixed with sorbitol in each concentration.

| Isolates | Concentration of Sorbitol (g/L) |    |     |     |     |     |     |
|----------|---------------------------------|----|-----|-----|-----|-----|-----|
|          | 0                               | 85 | 175 | 285 | 405 | 520 | 605 |
| DF1      | +                               | +  | +   | +   | +   | +   | +   |
| DF3      | +                               | +  | +   | +   | +   | -   | -   |
| DF5      | +                               | +  | +   | +   | +   | -   | -   |
| DF8      | +                               | +  | +   | +   | +   | -   | -   |

Note: + means fungi can growth on PDA agar; - means fungi cannot growth on PDA agar.

**Table S2.** pH value of fungal isolates after incubation for 5 days.

| Isolates | Initial pH | Final pH     |
|----------|------------|--------------|
| WF7      | 4.49       | 4.12 ± 0.122 |
| WF8      | 4.49       | 3.91 ± 0.012 |
| WF9      | 4.49       | 4.03 ± 0.017 |
| WF10     | 4.49       | 3.67 ± 0.026 |
| WF11     | 4.49       | 3.72 ± 0.067 |
| WF12     | 4.49       | 3.50 ± 0.015 |
| WF13     | 4.49       | 3.77 ± 0.036 |
| WF15     | 4.49       | 4.02 ± 0.032 |
| DF1      | 4.47       | 4.13 ± 0.015 |
| DF3      | 4.47       | 3.98 ± 0.025 |
| DF5      | 4.47       | 4.00 ± 0.035 |
| DF8      | 4.47       | 3.96 ± 0.062 |

Note: WF ; isolates from sandstone sculpture in wet season. DF ; isolates from sandstone sculpture in dry season.

**Table S3.** Identification of isolated fungal strains based on 18S rRNA gene sequence analysis and their close relative published in NCBI databases.

| Isolate | Description                                                                     | Query Coverage | Percent Identity | Accession Number     |
|---------|---------------------------------------------------------------------------------|----------------|------------------|----------------------|
| WG      | <i>Penicillium citrinum</i> isolate NJC70 internal transcribed spacer 1         | 100 %          | 100 %            | OQ283805<br>OQ283806 |
| WI      | <i>Aspergillus niger</i> isolate RMUAN40 internal transcribed spacer 1          | 100 %          | 100 %            | OQ283807<br>OQ283808 |
| WJ      | <i>Fusarium solani</i> isolate sample47 internal transcribed spacer 1           | 100 %          | 99.78 %          | OQ283809<br>OQ283810 |
| WK      | <i>Fusarium equiseti</i> isolate C1-47 small subunit ribosomal RNA gene         | 100 %          | 100 %            | OQ283811<br>OQ283812 |
| WL      | <i>Fusarium oxysporum</i> isolate NJ3256 internal transcribed spacer 1          | 100 %          | 100 %            | OQ283813<br>OQ283814 |
| WM      | <i>Aspergillus nomius</i> strain 110P internal transcribed spacer 1             | 100 %          | 100 %            | OQ283815<br>OQ283816 |
| WO      | <i>Trichoderma asperellum</i> isolate Tr17 small subunit ribosomal RNA gene     | 100 %          | 100 %            | OQ283817<br>OQ283818 |
| DF1     | <i>Penicillium</i> sp. Y28 18S ribosomal RNA gene, partial sequence             | 100%           | 100%             | OR048738             |
| DF3     | <i>Phoma destructiva</i> gene for 18S rRNA, partial sequence, isolate: MUCC0064 | 99%            | 100%             | OR048739             |

|     |                                                                                   |     |      |          |
|-----|-----------------------------------------------------------------------------------|-----|------|----------|
| DF5 | <i>Aspergillus niger</i> small subunit ribosomal RNA gene, partial sequence       | 99% | 99%  | OR048740 |
| DF8 | <i>Pestalotiopsis maculans</i> for 18S rRNA, partial sequence, strain: CBS 322.76 | 99% | 100% | OR048741 |
